# Supplementary material for: Comparative transcriptomic and metabolic analysis reveals the effect of melatonin on delaying anthracnose incidence upon postharvest banana fruit peel
Source: BMC Plant Biol. 2019 Jul 1;19:289. doi: 10.1186/s12870-019-1855-2 (PMC6604187; doi:10.1186/s12870-019-1855-2)
Supplement: Supplementary file 9 — Excel S1. Differentially expressed genes in banana peel after melatonin treatment. (XLSX 78 kb) [file 12870_2019_1855_MOESM9_ESM.xlsx]

## Sheet: Total
Gene ID	Log2Ratio(Melatonin/control)	Description
GSMUA_Achr3T02810_001	-1.97229	12-oxophytodienoate reductase 2
GSMUA_Achr1T21160_001	-1.2564	18.5 kDa class I heat shock protein
GSMUA_Achr6T00870_001	-1.83571	1-aminocyclopropane-1-carboxylate oxidase
GSMUA_Achr10T05230_001	-8.98014	40S ribosomal protein S3-1, putative, expressed
GSMUA_Achr2T13890_001	-1.50301	5'-adenylylsulfate reductase 3, chloroplastic
GSMUA_Achr8T01550_001	-1.33607	60S ribosomal protein L10
GSMUA_Achr7T11550_001	-2.16209	6-phosphofructokinase 5, chloroplastic
GSMUA_Achr1T08050_001	-4.18123	ABC transporter G family member 39
GSMUA_Achr10T23680_001	-9.07325	ADP,ATP carrier protein 1, chloroplastic
GSMUA_Achr3T26460_001	-1.71667	Aldehyde dehydrogenase family 2 member C4
GSMUA_Achr6T35650_001	-1.53849	aluminum-activated malate transporter, putative, expressed
GSMUA_Achr10T12150_001	-2.287	AP2 domain transcription factor RAP2.3, putative
GSMUA_Achr4T06550_001	-8.56097	ATP-dependent Clp protease proteolytic subunit 3, chloroplastic
GSMUA_Achr4T28840_001	-8.48113	Beta-glucosidase 18
GSMUA_Achr8T26890_001	-2.73836	Bifunctional 3'-phosphoadenosine 5'-phosphosulfate synthase
GSMUA_Achr3T13570_001	-2.45455	Bifunctional 3'-phosphoadenosine 5'-phosphosulfate synthase 2
GSMUA_Achr1T14080_001	-1.79956	Bifunctional 3'-phosphoadenosine 5'-phosphosulfate synthase 2
GSMUA_Achr5T05720_001	-1.85356	Bifunctional monodehydroascorbate reductase and carbonic anhydrase nectarin-3
GSMUA_Achr2T04820_001	-4.59538	Caffeic acid 3-O-methyltransferase
GSMUA_Achr2T04380_001	-6.05278	Caffeic acid O-methyltransferase [Iris x hollandica]
GSMUA_Achr5T09010_001	-1.58833	Calmodulin
GSMUA_Achr3T02390_001	-2.6407	Calnexin homolog 1
GSMUA_AchrUn_randomT15010_001	-2.14024	Cell wall-associated hydrolase, partial [Medicago truncatula]
GSMUA_Achr5T29740_001	-4.37856	Chalcone synthase 2
GSMUA_Achr3T01140_001	-2.10643	Chalcone synthase 2
GSMUA_Achr10T20590_001	-2.30639	Chalcone synthase J
GSMUA_AchrUn_randomT15030_001	-1.91279	chloroplast hypothetical protein [Zea mays subsp. mays]
GSMUA_Achr11T12340_001	-1.90127	Clavaminate synthase-like protein At3g21360
GSMUA_Achr9T25760_001	-1.5868	Cysteine synthase
GSMUA_Achr5T24640_001	-1.28122	Derlin-2.2
GSMUA_Achr10T11290_001	-2.31653	DUF292 domain containing protein, expressed
GSMUA_Achr6T21330_001	-1.36716	Endochitinase PR4
GSMUA_Achr1T07620_001	-1.40762	Endoplasmin homolog
GSMUA_Achr2T06550_001	-3.98819	Expressed protein
GSMUA_Achr4T18200_001	-3.94655	expressed protein
GSMUA_AchrUn_randomT17040_001	-2.81395	expressed protein
GSMUA_AchrUn_randomT09430_001	-1.34986	expressed protein
GSMUA_Achr2T02700_001	-1.18781	Expressed protein
GSMUA_Achr11T15630_001	-3.10153	Flavonoid 3',5'-hydroxylase 2
GSMUA_Achr11T01650_001	-2.3053	Flotillin-like protein 1
GSMUA_Achr9T01150_001	-1.64254	GEM-like protein 5
GSMUA_Achr7T08230_001	-1.86866	gibberellin 20 oxidase 2, putative, expressed
GSMUA_Achr11T26200_001	-1.65778	Glucan endo-1,3-beta-glucosidase 14
GSMUA_Achr10T04510_001	-2.48712	glycosyl transferase, putative, expressed
GSMUA_Achr3T24070_001	-2.53477	Glyoxysomal fatty acid beta-oxidation multifunctional protein MFP-a
GSMUA_Achr9T21350_001	-2.95521	GTP-binding protein SAR1A
GSMUA_Achr5T07360_001	-1.65015	heat shock protein DnaJ, putative, expressed
GSMUA_Achr7T18900_001	-1.95479	Heat stress transcription factor B-1
GSMUA_Achr8T04550_001	-2.9892	Homocysteine S-methyltransferase 2
GSMUA_Achr1T03910_001	-2.25794	HSP transcription factor
GSMUA_Achr6T35910_001	-1.6228	Hypersensitive-induced response protein 1
GSMUA_Achr5T15670_001	-9.45943	Hypothetical protein
GSMUA_Achr6T14740_001	-9.14466	Hypothetical protein
GSMUA_Achr10T05140_001	-9.05799	Hypothetical protein
GSMUA_Achr9T07250_001	-9.02975	Hypothetical protein
GSMUA_Achr7T21720_001	-8.92283	Hypothetical protein
GSMUA_Achr6T29990_001	-8.85487	Hypothetical protein
GSMUA_Achr2T04700_001	-8.82549	Hypothetical protein
GSMUA_Achr9T19360_001	-8.82337	Hypothetical protein
GSMUA_Achr11T14730_001	-8.76155	Hypothetical protein
GSMUA_Achr8T21740_001	-8.73697	Hypothetical protein
GSMUA_Achr8T15450_001	-8.73471	Hypothetical protein
GSMUA_Achr3T01070_001	-8.7211	Hypothetical protein
GSMUA_Achr10T16362_001	-8.70621	Hypothetical protein
GSMUA_Achr11T05830_001	-8.60115	Hypothetical protein
GSMUA_Achr3T01550_001	-8.57994	Hypothetical protein
GSMUA_Achr1T27680_001	-8.55587	Hypothetical protein
GSMUA_Achr7T24680_001	-8.53398	Hypothetical protein
GSMUA_Achr11T00170_001	-8.46761	Hypothetical protein
GSMUA_Achr11T22980_001	-8.44571	Hypothetical protein
GSMUA_AchrUn_randomT23950_001	-4.3662	Hypothetical protein
GSMUA_Achr1T23710_001	-3.45322	Hypothetical protein
GSMUA_Achr8T04540_001	-3.18915	Hypothetical protein
GSMUA_Achr7T09720_001	-2.93065	Hypothetical protein
GSMUA_Achr10T16850_001	-2.8249	Hypothetical protein
GSMUA_Achr3T09550_001	-2.64328	Hypothetical protein
GSMUA_Achr4T05380_001	-2.58631	Hypothetical protein
GSMUA_AchrUn_randomT10220_001	-2.53925	Hypothetical protein
GSMUA_Achr4T33410_001	-2.5346	Hypothetical protein
GSMUA_Achr8T31170_001	-2.3835	Hypothetical protein
GSMUA_Achr9T30820_001	-2.26355	Hypothetical protein
GSMUA_AchrUn_randomT22450_001	-2.24443	Hypothetical protein
GSMUA_AchrUn_randomT18200_001	-2.2231	Hypothetical protein
GSMUA_AchrUn_randomT27370_001	-2.18119	Hypothetical protein
GSMUA_Achr9T30400_001	-2.0904	Hypothetical protein
GSMUA_AchrUn_randomT24270_001	-2.04654	Hypothetical protein
GSMUA_Achr4T07740_001	-1.98598	Hypothetical protein
GSMUA_Achr2T22350_001	-1.89339	Hypothetical protein
GSMUA_Achr11T19600_001	-1.89182	Hypothetical protein
GSMUA_AchrUn_randomT24260_001	-1.88283	Hypothetical protein
GSMUA_AchrUn_randomT26660_001	-1.8504	Hypothetical protein
GSMUA_Achr9T11720_001	-1.82354	Hypothetical protein
GSMUA_Achr11T10330_001	-1.8214	Hypothetical protein
GSMUA_Achr9T29350_001	-1.81382	Hypothetical protein
GSMUA_Achr7T03510_001	-1.77333	Hypothetical protein
GSMUA_Achr9T30600_001	-1.77228	Hypothetical protein
GSMUA_AchrUn_randomT19530_001	-1.74033	Hypothetical protein
GSMUA_Achr2T07030_001	-1.73841	Hypothetical protein
GSMUA_Achr1T16770_001	-1.66803	Hypothetical protein
GSMUA_Achr11T11810_001	-1.64668	Hypothetical protein
GSMUA_AchrUn_randomT22460_001	-1.64421	Hypothetical protein
GSMUA_Achr8T20990_001	-1.63205	Hypothetical protein
GSMUA_Achr3T17760_001	-1.61652	Hypothetical protein
GSMUA_AchrUn_randomT21350_001	-1.59975	Hypothetical protein
GSMUA_AchrUn_randomT24900_001	-1.59191	Hypothetical protein
GSMUA_Achr11T03550_001	-1.52687	Hypothetical protein
GSMUA_Achr9T04610_001	-1.49177	Hypothetical protein
GSMUA_Achr1T01830_001	-1.39138	Hypothetical protein
GSMUA_Achr5T17150_001	-1.35278	Hypothetical protein
GSMUA_Achr10T30830_001	-1.30945	Hypothetical protein
GSMUA_AchrUn_randomT24320_001	-1.20656	Hypothetical protein
GSMUA_Achr3T30040_001	-1.19291	Hypothetical protein
GSMUA_Achr4T13610_001	-3.6942	Inhibitor of trypsin and hageman factor
GSMUA_Achr6T33870_001	-2.13756	Laccase-25
GSMUA_Achr7T06660_001	-1.48586	L-lactate dehydrogenase A
GSMUA_Achr4T06820_001	-1.53344	LOB domain-containing protein 41
GSMUA_Achr4T11940_001	-1.56656	Luminal-binding protein 4
GSMUA_Achr3T27250_001	-2.45892	Luminal-binding protein 5
GSMUA_Achr9T23710_001	-1.71762	Luminal-binding protein 5
GSMUA_Achr8T13220_001	-2.62848	Lysine histidine transporter-like 8
GSMUA_Achr2T15360_001	-1.37426	membrane protein, putative, expressed
GSMUA_Achr7T19900_001	-2.81914	Metalloendoproteinase 1
GSMUA_Achr1T01860_001	-3.34767	Miraculin
GSMUA_Achr10T10390_001	-2.05412	Momilactone A synthase
GSMUA_AchrUn_randomT16180_001	-1.70496	Momilactone A synthase
GSMUA_Achr4T02390_001	-1.80533	NAC protein 1
GSMUA_Achr5T27130_001	-1.63438	Ocs element-binding factor 1
GSMUA_AchrUn_randomT15020_001	-2.09212	ORF40u
GSMUA_Achr6T14850_001	-1.47745	oxidoreductase, putative, expressed
GSMUA_Achr3T08250_001	-2.67174	Pathogenesis-related protein 1
GSMUA_Achr8T05970_001	-1.96007	Peptide methionine sulfoxide reductase B3, chloroplastic
GSMUA_Achr1T09070_001	-1.9431	Phenylalanine ammonia-lyase
GSMUA_Achr9T29530_001	-2.24345	PI-PLC X domain-containing protein At5g67130
GSMUA_Achr7T18580_001	-2.54609	plant viral response family protein, putative, expressed
GSMUA_Achr10T29560_001	-1.63217	plant viral response family protein, putative, expressed
GSMUA_Achr7T03450_001	-2.77737	Polyphenol oxidase, chloroplastic
GSMUA_AchrUn_randomT23290_001	-9.76044	predicted protein [Micromonas pusilla CCMP1545]
GSMUA_AchrUn_randomT23830_001	-2.03741	PREDICTED: uncharacterized protein LOC100803853 [Glycine max]
GSMUA_Achr9T26040_001	-1.32204	Probable glutathione S-transferase parA
GSMUA_Achr3T07660_001	-1.72517	Probable NAD(P)H-dependent oxidoreductase 1
GSMUA_Achr3T07670_001	-1.52595	Probable NAD(P)H-dependent oxidoreductase 1
GSMUA_Achr8T21000_001	-1.59773	Protein IN2-1 homolog B
GSMUA_Achr6T08550_001	-1.68286	Protein kinase 2A, chloroplastic
GSMUA_Achr10T11030_001	-2.77746	Putative 22.7 kDa class IV heat shock protein
GSMUA_AchrUn_randomT16850_001	-1.82133	Putative 6-hydroxynicotinate 3-monooxygenase
GSMUA_Achr8T20040_001	-8.52617	Putative 8-amino-7-oxononanoate synthase/2-amino-3-ketobutyrate coenzyme A ligase
GSMUA_Achr8T27900_001	-1.50803	Putative Acidic endochitinase SE2
GSMUA_Achr8T27910_001	-1.39221	Putative Acidic endochitinase SE2
GSMUA_Achr9T17320_001	-3.34989	Putative Alpha-glucosidase yihQ
GSMUA_Achr10T18670_001	-1.87662	Putative AP2 domain class transcription factor
GSMUA_Achr1T07390_001	-1.3912	Putative Aspartic proteinase-like protein 1
GSMUA_Achr4T16560_001	-2.28177	Putative Auxin-induced in root cultures protein 12
GSMUA_Achr3T05440_001	-2.15455	Putative Cation transport regulator-like protein 2
GSMUA_Achr4T28900_001	-1.69396	Putative conserved hypothetical protein
GSMUA_Achr10T10380_001	-1.83788	Putative Cytochrome c oxidase subunit 3
GSMUA_Achr8T32610_001	-3.45419	Putative Cytochrome P450 71A2
GSMUA_Achr6T30740_001	-2.28214	Putative Cytochrome P450 71D10
GSMUA_Achr6T30710_001	-2.11653	Putative Cytochrome P450 71D10
GSMUA_Achr9T30610_001	-2.74061	Putative Cytochrome P450 71D8
GSMUA_Achr9T30630_001	-2.67858	Putative Cytochrome P450 71D8
GSMUA_Achr7T06590_001	-1.99222	Putative Cytochrome P450 89A2
GSMUA_Achr1T02720_001	-2.50392	Putative Disease resistance response protein 206
GSMUA_Achr9T11260_001	-2.43367	Putative Disease resistance response protein 206
GSMUA_Achr8T15700_001	-1.3854	Putative Disease resistance response protein 206
GSMUA_Achr9T11220_001	-1.34117	Putative Disease resistance response protein 206
GSMUA_Achr8T33890_001	-1.83444	Putative DnaJ homolog subfamily B member 11
GSMUA_Achr9T29630_001	-1.82559	Putative E3 ubiquitin-protein ligase PUB23
GSMUA_Achr2T22290_001	-1.80902	Putative Elongation factor G, mitochondrial
GSMUA_Achr5T15660_001	-2.0147	Putative expressed protein
GSMUA_Achr11T07990_001	-1.97117	Putative expressed protein
GSMUA_Achr11T14140_001	-1.84387	Putative expressed protein
GSMUA_Achr9T12660_001	-1.65715	Putative expressed protein
GSMUA_Achr6T14910_001	-1.33854	Putative expressed protein
GSMUA_Achr4T18220_001	-1.67061	Putative Extended synaptotagmin-2
GSMUA_Achr2T11090_001	-1.78075	Putative GDSL esterase/lipase At1g71250
GSMUA_AchrUn_randomT28090_001	-5.10406	Putative Germin-like protein 3-7
GSMUA_Achr1T17720_001	-3.29454	Putative harpin-induced protein 1 domain containing protein, expressed
GSMUA_Achr5T15900_001	-2.03596	Putative Heat stress transcription factor A-3
GSMUA_Achr7T09730_001	-2.46008	Putative Homeobox-leucine zipper protein HAT5
GSMUA_Achr9T10720_001	-1.57578	Putative Horcolin
GSMUA_Achr10T20220_001	-1.5516	Putative Hypoxia up-regulated protein 1
GSMUA_Achr1T09740_001	-1.95776	Putative Limonoid UDP-glucosyltransferase
GSMUA_Achr11T22680_001	-1.77683	Putative LTPL85 - Protease inhibitor/seed storage/LTP family protein precursor, expressed
GSMUA_Achr3T12210_001	-1.5903	Putative mannan endo-1,4-beta-mannosidase 9
GSMUA_Achr8T11790_001	-1.41532	Putative Methionine gamma-lyase
GSMUA_Achr8T29600_001	-1.49965	Putative NADH-quinone oxidoreductase subunit I
GSMUA_Achr4T02800_001	-3.08646	Putative OsWRKY11 - Superfamily of TFs having WRKY and zinc finger domains, expressed
GSMUA_Achr9T05900_001	-1.90505	Putative Phosphoethanolamine/phosphocholine phosphatase
GSMUA_Achr1T00620_001	-2.17819	Putative Phosphorylated carbohydrates phosphatase TM_1254
GSMUA_Achr5T08860_001	-1.91708	Putative Phytosulfokines 3
GSMUA_Achr6T21070_001	-5.34865	Putative plant-specific domain TIGR01615 family protein, expressed
GSMUA_Achr3T03980_001	-3.38666	Putative Predicted protein
GSMUA_Achr5T11960_001	-1.97401	Putative Probable glutathione S-transferase
GSMUA_Achr1T00010_001	-1.3792	Putative Probable glutathione S-transferase
GSMUA_Achr1T03800_001	-1.3192	Putative Probable glutathione S-transferase GSTU6
GSMUA_AchrUn_randomT03740_001	-1.33515	Putative Probable phosphatase phospho1
GSMUA_Achr9T21440_001	-2.80877	Putative Probable serine/threonine-protein kinase At1g18390
GSMUA_Achr8T18890_001	-1.99304	Putative Protein disulfide-isomerase
GSMUA_Achr7T12170_001	-1.3838	Putative Protein disulfide-isomerase A6
GSMUA_Achr1T24050_001	-3.33571	Putative Reticuline oxidase
GSMUA_Achr7T02760_001	-2.65107	Putative selenium-binding protein
GSMUA_Achr7T22240_001	-2.55527	Putative Sodium-coupled neutral amino acid transporter 1
GSMUA_Achr2T01540_001	-2.87843	Putative syntaxin-131
GSMUA_Achr4T24440_001	-2.33523	Putative Transcription factor bHLH36
GSMUA_AchrUn_randomT21370_001	-1.76409	Putative Uncharacterized amino-acid permease C15C4.04c
GSMUA_Achr7T18020_001	-2.24708	Putative Uncharacterized hydroxylase C887.15c
GSMUA_Achr9T12270_001	-3.21214	Putative uncharacterized protein
GSMUA_Achr2T21990_001	-2.88613	Putative uncharacterized protein
GSMUA_Achr6T24100_001	-1.8576	Putative uncharacterized protein
GSMUA_AchrUn_randomT24910_001	-1.53971	Putative uncharacterized protein
GSMUA_Achr6T20100_001	-1.60847	Putative Uncharacterized protein C1orf14
GSMUA_Achr6T14970_001	-1.41935	Putative Uncharacterized protein C3orf32
GSMUA_Achr3T24540_001	-1.34638	Putative uncharacterized protein Sb01g002560
GSMUA_Achr1T19750_001	-1.33981	Putative uncharacterized protein Sb10g024430
GSMUA_Achr9T21210_001	-2.9959	Putative Uncharacterized transporter YBR287W
GSMUA_Achr5T13330_001	-1.67813	Putative Uncharacterized UDP-glucosyltransferase At1g05670
GSMUA_Achr10T10830_001	-1.47182	Putative UPF0580 protein C15orf58 homolog
GSMUA_Achr6T05880_001	-3.37273	Putative WRKY transcription factor 6
GSMUA_Achr8T17970_001	-1.82661	ribosomal L18p/L5e family protein, putative, expressed
GSMUA_Achr11T15350_001	-1.18711	Ribulose-phosphate 3-epimerase, cytoplasmic isoform
GSMUA_Achr8T20430_001	-1.94377	Short-chain type dehydrogenase/reductase
GSMUA_Achr11T01280_001	-1.53842	SK3-type dehydrin [Musa ABB Group]
GSMUA_Achr6T07980_001	-2.211	Somatic embryogenesis receptor kinase 1
GSMUA_Achr7T19810_001	-1.38489	Sucrose synthase 1
GSMUA_Achr2T14120_001	-2.37502	Sugar carrier protein C
GSMUA_Achr7T27070_001	-3.55114	Sugar transport protein 13
GSMUA_Achr7T11690_001	-2.58418	Sulfate transporter 1.3
GSMUA_Achr2T16170_001	-1.52616	Sulfate transporter 4.1, chloroplastic
GSMUA_Achr8T31840_001	-2.16477	tetratricopeptide repeat domain containing protein, expressed
GSMUA_Achr7T12290_001	-1.85712	tetratricopeptide repeat domain containing protein, expressed
GSMUA_AchrUn_randomT27040_001	-2.79869	Trans-cinnamate 4-monooxygenase
GSMUA_Achr9T14110_001	-1.69795	Trans-cinnamate 4-monooxygenase
GSMUA_Achr9T03430_001	-2.6495	Tropinone reductase homolog
GSMUA_Achr5T04560_001	-1.97118	Tropinone reductase homolog At1g07440
GSMUA_Achr11T24060_001	-1.87604	Tropinone reductase homolog At1g07440
GSMUA_Achr11T19850_001	-1.22493	Vacuolar-sorting receptor 1
GSMUA_Achr5T06740_001	-1.42478	VMP3 protein [Volvox carteri f. nagariensis]
GSMUA_AchrUn_randomT22810_001	-2.63256	Whole genome shotgun sequence of line PN40024, scaffold_7.assembly12x (Fragment)
GSMUA_Achr5T20480_001	-1.70889	zinc finger family protein, putative, expressed
GSMUA_Achr1T25270_001	-1.50534	ZOS1-09 - C2H2 zinc finger protein, expressed
GSMUA_Achr10T13540_001	-2.85327	ZOS3-09 - C2H2 zinc finger protein, expressed
GSMUA_Achr9T11620_001	2.33719	15.4 kDa class V heat shock protein
GSMUA_Achr7T18420_001	1.51367	1-aminocyclopropane-1-carboxylate oxidase
GSMUA_Achr3T02010_001	2.21645	3-ketoacyl-CoA synthase 10
GSMUA_Achr6T11690_001	5.42694	3-ketoacyl-CoA synthase 10
GSMUA_Achr9T06980_001	2.79901	3-ketoacyl-CoA synthase 4
GSMUA_Achr6T27270_001	2.87977	3-ketoacyl-CoA synthase 4
GSMUA_Achr8T14210_001	1.72015	4-coumarate--CoA ligase-like 1
GSMUA_Achr7T07200_001	1.60467	Abscisic acid 8'-hydroxylase 1
GSMUA_Achr6T25350_001	1.3413	Actin-3
GSMUA_Achr9T01630_001	1.73844	Adenosylhomocysteinase
GSMUA_Achr8T11740_001	1.23788	Aldehyde dehydrogenase family 3 member F1
GSMUA_Achr4T32600_001	1.61511	Alpha-1,4 glucan phosphorylase L isozyme, chloroplastic/amyloplastic
GSMUA_Achr1T00020_001	2.22008	Alpha-galactosidase
GSMUA_Achr4T32180_001	2.8028	Amino acid permease 6
GSMUA_Achr9T07300_001	1.87852	Anthocyanidin 3-O-glucosyltransferase
GSMUA_Achr11T00590_001	1.74069	Aquaporin PIP2-3
GSMUA_Achr10T07480_001	1.95007	Arginine decarboxylase
GSMUA_Achr1T18560_001	2.49148	armadillo/beta-catenin repeat family protein, putative, expressed
GSMUA_Achr8T26850_001	2.21844	Auxin-induced protein PCNT115
GSMUA_Achr2T09660_001	1.33771	Basic helix-loop-helix (BHLH) family protein
GSMUA_Achr5T09660_001	1.82288	Bowman-Birk type proteinase isoinhibitor D [Glycine soja]
GSMUA_Achr5T06840_001	4.71307	C4-dicarboxylate transporter/malic acid transport protein, expressed
GSMUA_Achr6T21640_001	1.42824	calcium-binding EF hand family protein, putative, expressed
GSMUA_Achr3T16870_001	2.98142	Calmodulin-like protein 5
GSMUA_Achr1T17550_001	1.464	Catalase isozyme 2
GSMUA_Achr7T26970_001	1.6879	CBL-interacting protein kinase 6
GSMUA_Achr6T13160_001	1.59567	cell wall invertase [Musa acuminata]
GSMUA_Achr10T15740_001	1.68857	cell wall invertase [Musa acuminata]
GSMUA_Achr10T15730_001	4.05146	cell wall invertase [Musa acuminata]
GSMUA_Achr1T23960_001	1.75847	Cellulose synthase-like protein D2
GSMUA_Achr10T12200_001	3.11738	Chalcone synthase
GSMUA_Achr6T10910_001	4.03934	Chalcone synthase 4
GSMUA_Achr9T12070_001	1.63189	Chitin-inducible gibberellin-responsive protein 1
GSMUA_Achr6T24170_001	1.71508	Chloride channel protein CLC-c
GSMUA_Achr11T15850_001	1.36401	COBRA-like protein 7
GSMUA_Achr7T27090_001	1.21893	Cycloartenol-C-24-methyltransferase 1
GSMUA_Achr4T29670_001	1.56522	Defensin-like protein 5
GSMUA_Achr4T19660_001	3.70749	Dehydration-responsive element-binding protein 1D
GSMUA_Achr8T11980_001	9.42836	Dehydration-responsive element-binding protein 1E
GSMUA_AchrUn_randomT21880_001	8.56986	DNA binding protein, putative, expressed
GSMUA_Achr4T01520_001	2.28369	DNA-damage-repair/toleration protein DRT100
GSMUA_AchrUn_randomT02480_001	2.70777	DUF538 domain containing protein, putative, expressed
GSMUA_Achr9T29450_001	1.78743	EARLY flowering protein, putative, expressed
GSMUA_Achr3T09170_001	2.51036	Early nodulin-93
GSMUA_Achr5T21900_001	1.75551	EDR2, putative, expressed
GSMUA_Achr1T03980_001	1.6616	EF hand family protein, putative, expressed
GSMUA_Achr9T12620_001	2.09508	EF hand family protein, putative, expressed
GSMUA_Achr9T16910_001	2.60133	Endoglucanase 9
GSMUA_Achr3T16850_001	2.55728	ethylene-responsive protein related, putative, expressed
GSMUA_Achr11T15810_001	3.92457	Ethylene-responsive transcription factor ERF071
GSMUA_Achr7T22330_001	1.53759	exo70 exocyst complex subunit domain containing protein, expressed
GSMUA_Achr10T31130_001	1.38308	exo70 exocyst complex subunit, putative, expressed
GSMUA_Achr5T07480_001	2.23948	Expansin-A2
GSMUA_AchrUn_randomT05270_001	1.38332	expressed protein
GSMUA_Achr4T15090_001	1.64784	expressed protein
GSMUA_Achr7T23560_001	1.83955	expressed protein
GSMUA_Achr3T00770_001	2.12248	expressed protein
GSMUA_Achr6T10610_001	2.23643	expressed protein
GSMUA_Achr10T18920_001	2.47002	expressed protein
GSMUA_Achr8T30310_001	2.91599	expressed protein
GSMUA_Achr7T27140_001	3.39205	expressed protein
GSMUA_Achr9T02880_001	8.75266	expressed protein
GSMUA_AchrUn_randomT20960_001	2.24098	Fasciclin-like arabinogalactan protein 17
GSMUA_Achr8T12220_001	1.90575	fatty acid hydroxylase, putative, expressed
GSMUA_Achr4T15110_001	1.79621	Gibberellin 2-beta-dioxygenase 1
GSMUA_Achr4T11730_001	3.37996	Glutathione S-transferase
GSMUA_Achr11T11040_001	1.19874	Glyceraldehyde-3-phosphate dehydrogenase, cytosolic 3
GSMUA_Achr1T01490_001	2.42225	glycosyl transferase 8 domain containing protein, putative, expressed
GSMUA_Achr9T07530_001	1.75704	glycosyl transferase family 17 protein, putative, expressed
GSMUA_Achr10T16790_001	2.29613	glycosyl transferase family 17 protein, putative, expressed
GSMUA_Achr5T24850_001	1.91096	glyoxalase family protein, putative, expressed
GSMUA_Achr6T24430_001	2.52465	Heat stress transcription factor A-2c
GSMUA_Achr6T32740_001	2.52359	helicase conserved C-terminal domain containing protein, expressed
GSMUA_Achr7T12790_001	1.97813	helix-loop-helix DNA-binding protein, putative, expressed
GSMUA_Achr5T28920_001	1.47217	hs1, putative, expressed
GSMUA_Achr10T00680_001	2.58195	hs1, putative, expressed
GSMUA_Achr7T08870_001	1.22474	Hypothetical protein
GSMUA_Achr6T04800_001	1.24027	Hypothetical protein
GSMUA_Achr5T06470_001	1.35064	Hypothetical protein
GSMUA_Achr1T11440_001	1.35068	Hypothetical protein
GSMUA_Achr10T11460_001	1.38126	Hypothetical protein
GSMUA_Achr10T12570_001	1.45943	Hypothetical protein
GSMUA_Achr10T23230_001	1.49635	Hypothetical protein
GSMUA_Achr8T30830_001	1.50988	Hypothetical protein
GSMUA_Achr7T09900_001	1.52653	Hypothetical protein
GSMUA_Achr10T01300_001	1.55348	Hypothetical protein
GSMUA_Achr1T18570_001	1.56729	Hypothetical protein
GSMUA_Achr8T26760_001	1.57616	Hypothetical protein
GSMUA_Achr1T17560_001	1.60948	Hypothetical protein
GSMUA_AchrUn_randomT22570_001	1.6703	Hypothetical protein
GSMUA_Achr8T05150_001	1.77825	Hypothetical protein
GSMUA_Achr6T00850_001	1.79835	Hypothetical protein
GSMUA_AchrUn_randomT20360_001	1.79847	Hypothetical protein
GSMUA_AchrUn_randomT14840_001	1.84209	Hypothetical protein
GSMUA_Achr7T26740_001	1.84628	Hypothetical protein
GSMUA_Achr1T22700_001	1.85041	Hypothetical protein
GSMUA_Achr5T22180_001	1.85701	Hypothetical protein
GSMUA_Achr7T26570_001	1.89394	Hypothetical protein
GSMUA_Achr1T00490_001	1.97844	Hypothetical protein
GSMUA_Achr10T18740_001	1.99266	Hypothetical protein
GSMUA_Achr9T29710_001	2.07383	Hypothetical protein
GSMUA_Achr11T17370_001	2.13443	Hypothetical protein
GSMUA_Achr7T06910_001	2.14611	Hypothetical protein
GSMUA_Achr3T13060_001	2.31595	Hypothetical protein
GSMUA_Achr5T21160_001	2.31719	Hypothetical protein
GSMUA_Achr4T02560_001	2.40622	Hypothetical protein
GSMUA_Achr9T18430_001	2.46267	Hypothetical protein
GSMUA_Achr4T01510_001	2.55531	Hypothetical protein
GSMUA_Achr8T07400_001	2.59456	Hypothetical protein
GSMUA_Achr8T07390_001	2.98553	Hypothetical protein
GSMUA_Achr8T07410_001	3.46128	Hypothetical protein
GSMUA_Achr6T30430_001	3.65836	Hypothetical protein
GSMUA_Achr6T14580_001	3.8849	Hypothetical protein
GSMUA_Achr7T12670_001	4.05809	Hypothetical protein
GSMUA_Achr6T04860_001	4.21221	Hypothetical protein
GSMUA_Achr4T16640_001	4.24181	Hypothetical protein
GSMUA_Achr6T02310_001	4.56596	Hypothetical protein
GSMUA_AchrUn_randomT28650_001	5.0268	Hypothetical protein
GSMUA_Achr9T05280_001	8.44984	Hypothetical protein
GSMUA_Achr1T10620_001	8.48516	Hypothetical protein
GSMUA_Achr6T17970_001	8.48516	Hypothetical protein
GSMUA_Achr11T08460_001	8.4865	Hypothetical protein
GSMUA_AchrUn_randomT26494_001	8.49052	Hypothetical protein
GSMUA_Achr8T25190_001	8.50779	Hypothetical protein
GSMUA_Achr10T08870_001	8.56986	Hypothetical protein
GSMUA_Achr6T33910_001	8.62936	Hypothetical protein
GSMUA_Achr3T01960_001	8.73358	Hypothetical protein
GSMUA_Achr4T25030_001	8.82867	Hypothetical protein
GSMUA_Achr7T10530_001	8.83078	Hypothetical protein
GSMUA_Achr8T04270_001	8.83183	Hypothetical protein
GSMUA_Achr10T04970_001	8.87036	Hypothetical protein
GSMUA_Achr10T26460_001	9.15059	Hypothetical protein
GSMUA_Achr3T19783_001	9.15819	Hypothetical protein
GSMUA_Achr1T01600_001	9.34725	Hypothetical protein
GSMUA_Achr3T23100_001	10.2452	Hypothetical protein
GSMUA_Achr9T27290_001	1.52275	integral membrane protein, putative, expressed
GSMUA_Achr5T04350_001	1.56051	L-ascorbate oxidase
GSMUA_Achr5T04080_001	2.92794	Leucoanthocyanidin dioxygenase
GSMUA_Achr4T14150_001	1.38388	LOB domain-containing protein 37
GSMUA_Achr3T30130_001	2.27805	LOB domain-containing protein 39
GSMUA_Achr4T28670_001	2.06555	lysine-rich arabinogalactan protein 19 precursor, putative, expressed
GSMUA_Achr6T33100_001	1.55877	Mitogen-activated protein kinase 5
GSMUA_Achr11T04930_001	3.30314	MYB family transcription factor, putative, expressed
GSMUA_Achr2T02770_001	2.25439	Naringenin,2-oxoglutarate 3-dioxygenase (Fragment)
GSMUA_Achr1T08716_001	3.21871	NBS-LRR class resistance protein (Fragment)
GSMUA_Achr11T10400_001	1.46603	NHL25, putative, expressed
GSMUA_Achr6T36750_001	1.48869	Nitrate transporter 1.1
GSMUA_Achr1T20240_001	1.57884	Nitrate transporter 1.1
GSMUA_Achr4T21260_001	2.75733	Non-specific lipid-transfer protein
GSMUA_Achr5T05940_001	1.93714	Nudix hydrolase 17, mitochondrial
GSMUA_AchrUn_randomT09600_001	3.18756	Nudix hydrolase 17, mitochondrial
GSMUA_Achr7T12480_001	2.02766	Nudix hydrolase 21, chloroplastic
GSMUA_Achr10T12080_001	1.44603	Obtusifoliol 14-alpha demethylase
GSMUA_Achr1T08380_001	3.24976	organic cation transporter-related, putative
GSMUA_Achr11T21690_001	1.47587	OsRhmbd16 - Putative Rhomboid homologue, expressed
GSMUA_Achr2T08100_001	1.92417	Patellin-3
GSMUA_Achr10T14220_001	2.89707	Peroxidase 4
GSMUA_Achr6T21530_001	2.14058	Peroxidase 52
GSMUA_AchrUn_randomT29140_001	4.03968	Peroxidase 70
GSMUA_Achr1T08470_001	2.85667	pherophorin-dz1 protein [Volvox carteri f. nagariensis]
GSMUA_Achr10T24630_001	3.41137	phosphate-induced protein 1 conserved region domain containing protein, expressed
GSMUA_Achr10T24650_001	3.82448	phosphate-induced protein 1 conserved region domain containing protein, expressed
GSMUA_Achr7T12680_001	3.9085	phosphate-induced protein 1 conserved region domain containing protein, expressed
GSMUA_Achr5T28270_001	2.69402	Phosphoinositide phospholipase C 4
GSMUA_Achr9T05000_001	2.34853	Phospholipid-transporting ATPase 1
GSMUA_Achr5T07370_001	1.72741	Potassium transporter 1
GSMUA_Achr1T21890_001	1.90039	Predicted protein
GSMUA_Achr5T29560_001	6.48329	Predicted protein
GSMUA_Achr9T04880_001	1.79724	PREDICTED: probable calcium-binding protein CML27-like isoform 1 [Brachypodium distachyon]
GSMUA_Achr5T24800_001	2.7803	PREDICTED: uncharacterized protein YwkD-like [Solanum lycopersicum]
GSMUA_Achr8T27770_001	1.33997	Probable alpha,alpha-trehalose-phosphate synthase [UDP-forming] 7
GSMUA_AchrUn_randomT09120_001	1.80509	Probable aquaporin PIP1-2
GSMUA_AchrUn_randomT07520_001	3.43149	Probable aquaporin PIP1-2
GSMUA_Achr5T11480_001	2.32661	Probable aquaporin PIP2-6
GSMUA_Achr9T29700_001	2.02194	Probable CCR4-associated factor 1 homolog 11
GSMUA_Achr6T19450_001	2.1932	Probable CCR4-associated factor 1 homolog 11
GSMUA_Achr1T00190_001	2.62252	Probable galacturonosyltransferase-like 4
GSMUA_Achr5T12160_001	3.63665	Probable galacturonosyltransferase-like 4
GSMUA_Achr7T00150_001	1.42085	Probable indole-3-acetic acid-amido synthetase GH3.1
GSMUA_Achr7T26370_001	2.01099	Probable indole-3-acetic acid-amido synthetase GH3.8
GSMUA_Achr8T32550_001	1.90085	Probable methyltransferase PMT26
GSMUA_AchrUn_randomT25920_001	2.23694	Probable NAD(P)H-dependent oxidoreductase 2
GSMUA_Achr7T22120_001	1.38777	Probable potassium transporter 9
GSMUA_Achr8T10420_001	2.07677	Probable protein phosphatase 2C 33
GSMUA_Achr6T11170_001	1.41399	Probable protein phosphatase 2C 78
GSMUA_Achr4T02550_001	2.52047	Probable rhamnose biosynthetic enzyme 1
GSMUA_Achr4T06520_001	2.34084	Probable ribose-5-phosphate isomerase
GSMUA_Achr6T09830_001	1.48786	Probable serine/threonine-protein kinase At1g18390
GSMUA_Achr4T13730_001	1.90409	Probable serine/threonine-protein kinase At1g18390
GSMUA_Achr5T21880_001	3.10711	Probable xyloglucan endotransglucosylase/hydrolase protein 23
GSMUA_Achr3T05200_001	3.43276	Probable xyloglucan endotransglucosylase/hydrolase protein 23
GSMUA_Achr7T16430_001	3.55181	Probable xyloglucan endotransglucosylase/hydrolase protein 23
GSMUA_Achr10T23480_001	3.64949	Probable xyloglucan endotransglucosylase/hydrolase protein 23
GSMUA_Achr9T13820_001	4.05209	Probable xyloglucan endotransglucosylase/hydrolase protein 23
GSMUA_Achr8T30840_001	1.76933	Probable xyloglucan endotransglucosylase/hydrolase protein 28
GSMUA_Achr11T17890_001	2.13399	Probable xyloglucan endotransglucosylase/hydrolase protein 30
GSMUA_Achr6T30200_001	2.26081	Probable xyloglucan glycosyltransferase 12
GSMUA_Achr10T08330_001	2.56255	Probable xyloglucan glycosyltransferase 12
GSMUA_Achr9T05820_001	1.40335	protein kinase domain containing protein, expressed
GSMUA_Achr3T32120_001	1.57041	proteins of unknown function domain containing protein, expressed
GSMUA_Achr5T09690_001	1.47641	Putative 1-aminocyclopropane-1-carboxylate oxidase
GSMUA_Achr8T12460_001	2.12167	Putative 21 kDa protein
GSMUA_Achr6T35880_001	1.90553	Putative 2-aminoethanethiol dioxygenase
GSMUA_Achr4T08890_001	2.84193	Putative 3-ketoacyl-CoA synthase 11
GSMUA_Achr4T13040_001	1.53587	Putative ADP-ribosylation factor GTPase-activating protein AGD12
GSMUA_Achr9T29480_001	3.77782	Putative Auxin response factor 17
GSMUA_Achr8T09510_001	3.51117	Putative Basic 7S globulin
GSMUA_Achr7T25650_001	1.74021	Putative calcium-transporting ATPase 13, plasma membrane-type
GSMUA_Achr3T23000_001	1.75083	Putative Caltractin (Fragment)
GSMUA_Achr6T22020_001	2.60499	Putative Cysteine-rich receptor-like protein kinase 25
GSMUA_Achr7T05900_001	2.64333	Putative Dehydration-responsive element-binding protein 1D
GSMUA_Achr4T28860_001	1.95704	Putative Dihydroflavonol-4-reductase
GSMUA_Achr11T24490_001	2.33442	Putative domain of unknown function DUF966 domain containing protein, expressed
GSMUA_Achr10T30440_001	1.7333	Putative DRF-like transcription factor DRFL2a
GSMUA_Achr7T03220_001	3.40613	Putative E3 ubiquitin-protein ligase PUB23
GSMUA_Achr11T03210_001	4.11607	Putative Ethylene-responsive transcription factor ERF024
GSMUA_Achr1T00480_001	1.73029	Putative Ethylene-responsive transcription factor ERF105
GSMUA_Achr8T12600_001	1.39762	Putative expressed protein
GSMUA_Achr6T03900_001	1.40425	Putative expressed protein
GSMUA_Achr7T12260_001	1.64748	Putative expressed protein
GSMUA_Achr1T20910_001	1.70844	Putative expressed protein
GSMUA_Achr10T25150_001	1.7346	Putative expressed protein
GSMUA_Achr5T11190_001	1.93417	Putative expressed protein
GSMUA_Achr9T13220_001	1.97816	Putative expressed protein
GSMUA_Achr11T20670_001	2.10102	Putative expressed protein
GSMUA_Achr9T21690_001	2.22013	Putative expressed protein
GSMUA_Achr10T30690_001	2.4166	Putative expressed protein
GSMUA_Achr11T20190_001	4.75413	Putative expressed protein
GSMUA_Achr6T00170_001	1.36181	Putative G-box-binding factor 1
GSMUA_Achr6T13710_001	2.99273	Putative GDSL esterase/lipase At4g10955
GSMUA_AchrUn_randomT06210_001	1.78081	Putative Glutathione S-transferase theta-1
GSMUA_AchrUn_randomT27400_001	1.30709	Putative Glutelin type-A 1
GSMUA_Achr8T33540_001	2.04899	Putative Haloacid dehalogenase-like hydrolase domain-containing protein 3
GSMUA_Achr11T09090_001	1.92318	Putative harpin-induced protein 1 domain containing protein, expressed
GSMUA_Achr7T11760_001	1.52678	Putative Homeobox-leucine zipper protein HOX20
GSMUA_Achr2T06010_001	1.34434	Putative Leucine-rich repeat receptor protein kinase EXS
GSMUA_Achr7T26260_001	1.58678	Putative LOB domain-containing protein 37
GSMUA_Achr6T35610_001	2.83639	Putative Low affinity cationic amino acid transporter 2
GSMUA_Achr10T25070_001	1.40959	Putative Mitochondrial 2-oxoglutarate/malate carrier protein
GSMUA_Achr10T13040_001	1.67696	Putative Mitoferrin
GSMUA_Achr1T23990_001	2.7247	putative MYB DNA-binding domain superfamily protein [Zea mays]
GSMUA_Achr10T13760_001	1.46334	Putative Non-specific lipid-transfer protein-like protein At2g13820
GSMUA_Achr6T05710_001	3.61884	Putative OsWRKY69 - Superfamily of TFs having WRKY and zinc finger domains, expressed
GSMUA_Achr2T07240_001	2.53391	Putative PB1 domain containing protein, expressed
GSMUA_Achr6T14620_001	1.85282	Putative Peroxidase 52
GSMUA_Achr9T20550_001	2.01607	Putative peroxisomal-coenzyme A synthetase
GSMUA_Achr3T20420_001	1.69254	Putative phosphate-induced protein 1 conserved region domain containing protein, expressed
GSMUA_Achr1T11430_001	1.7944	Putative Polyadenylate-binding protein-interacting protein 2
GSMUA_AchrUn_randomT25250_001	1.52612	Putative Polyneuridine-aldehyde esterase
GSMUA_Achr1T22690_001	1.91547	Putative polyol transporter 1
GSMUA_Achr4T27490_001	1.23689	Putative Predicted protein
GSMUA_Achr3T01840_001	1.46551	Putative Predicted protein
GSMUA_Achr3T29120_001	1.99631	Putative Predicted protein
GSMUA_Achr1T27910_001	1.54026	Putative Probable calcium-binding protein CML31
GSMUA_Achr11T02820_001	2.13055	Putative Probable receptor-like protein kinase At5g24010
GSMUA_Achr1T24090_001	2.86147	Putative Probable receptor-like protein kinase At5g24010
GSMUA_Achr4T20600_001	1.77879	Putative Probable WRKY transcription factor 11
GSMUA_Achr11T10700_001	1.51025	Putative Probable WRKY transcription factor 33
GSMUA_Achr1T10080_001	2.67844	Putative Probable WRKY transcription factor 40
GSMUA_Achr9T17640_001	2.72752	Putative Protein RUPTURED POLLEN GRAIN 1
GSMUA_AchrUn_randomT26440_001	2.34025	Putative Protein SRG1
GSMUA_Achr11T09290_001	2.80339	Putative Protein TIFY 10B
GSMUA_Achr9T11610_001	1.64906	Putative Protein TRANSPARENT TESTA 12
GSMUA_Achr8T29940_001	2.06204	Putative Rab9 effector protein with kelch motifs
GSMUA_Achr3T21970_001	2.58699	Putative Receptor-like protein kinase HAIKU2
GSMUA_Achr2T13770_001	1.74565	Putative Remorin
GSMUA_AchrUn_randomT04690_001	1.45144	Putative RING-H2 zinc finger protein RHA1a
GSMUA_Achr4T26840_001	1.56101	Putative SAC3 family protein 2
GSMUA_Achr4T07190_001	1.29494	Putative Scarecrow-like protein 15
GSMUA_Achr10T05830_001	2.35716	Putative Serine/threonine-protein kinase-like protein ACR4
GSMUA_Achr6T13290_001	1.49041	Putative sialyltransferase family domain containing protein, expressed
GSMUA_Achr11T04550_001	1.76822	Putative S-norcoclaurine synthase 1
GSMUA_Achr11T04490_001	2.14431	Putative S-norcoclaurine synthase 1
GSMUA_Achr11T04520_001	2.44965	Putative S-norcoclaurine synthase 1
GSMUA_Achr1T12430_001	2.36257	Putative Solute carrier family 25 member 44
GSMUA_Achr10T11450_001	1.29192	Putative syntaxin 6, N-terminal domain containing protein, expressed
GSMUA_Achr8T26280_001	1.80841	Putative Transcription factor bHLH3
GSMUA_AchrUn_randomT01280_001	2.11202	Putative Transcription factor MYB44
GSMUA_Achr8T25140_001	1.70251	Putative U-box domain-containing protein 16
GSMUA_Achr7T22130_001	1.78738	Putative U-box domain-containing protein 16
GSMUA_Achr6T02470_001	2.34083	Putative U-box domain-containing protein 21
GSMUA_Achr7T18640_001	3.74356	Putative U-box domain-containing protein 21
GSMUA_Achr6T18140_001	1.62575	Putative U-box domain-containing protein 27
GSMUA_Achr2T10060_001	1.40749	Putative uncharacterized protein
GSMUA_Achr9T22480_001	1.68157	Putative uncharacterized protein
GSMUA_Achr7T03640_001	1.69154	Putative uncharacterized protein
GSMUA_AchrUn_randomT24330_001	2.51322	Putative uncharacterized protein
GSMUA_Achr2T01110_001	2.91167	Putative uncharacterized protein
GSMUA_Achr4T03640_001	2.01618	Putative uncharacterized protein (Fragment)
GSMUA_Achr10T28500_001	2.26929	Putative Uncharacterized protein At1g15400
GSMUA_Achr11T01270_001	1.79956	Putative Uncharacterized protein KIAA0754
GSMUA_Achr9T11280_001	1.45001	Putative uncharacterized protein Sb04g004110
GSMUA_Achr8T23240_001	1.59892	Putative uncharacterized protein Sb04g034290
GSMUA_Achr9T07610_001	4.08064	Putative Uncharacterized WD repeat-containing protein alr2800
GSMUA_Achr11T06320_001	2.41887	Putative Wall-associated receptor kinase 5
GSMUA_Achr2T08740_001	1.70969	Putative Wall-associated receptor kinase-like 14
GSMUA_AchrUn_randomT09900_001	1.70129	Putative Whole genome shotgun sequence of line PN40024, scaffold_0.assembly12x (Fragment)
GSMUA_Achr7T12310_001	2.61857	Putative Whole genome shotgun sequence of line PN40024, scaffold_4.assembly12x (Fragment)
GSMUA_Achr11T18080_001	1.47017	Putative Whole genome shotgun sequence of line PN40024, scaffold_77.assembly12x (Fragment)
GSMUA_Achr6T15760_001	1.29312	Putative Wound-induced protein 1
GSMUA_Achr8T11210_001	3.06325	Putative Xyloglucan galactosyltransferase KATAMARI1 homolog
GSMUA_Achr6T32910_001	1.62475	Putative Zinc finger CCCH domain-containing protein 66
GSMUA_Achr5T28260_001	1.85982	Putative Zinc finger CCCH domain-containing protein 66
GSMUA_Achr2T13410_001	1.44208	Putative Zinc finger protein 1
GSMUA_Achr5T07390_001	1.90285	Pyruvate decarboxylase isozyme 2
GSMUA_Achr2T06080_001	1.55446	Ras-related protein ARA-4
GSMUA_Achr3T21290_001	2.2666	Ras-related protein Rab11D
GSMUA_Achr9T04860_001	1.43434	Receptor-like protein kinase FERONIA
GSMUA_Achr5T26970_001	2.4356	Respiratory burst oxidase homolog protein B
GSMUA_Achr9T10200_001	2.59668	Reticulon-like protein B8
GSMUA_Achr10T28270_001	1.41683	retrotransposon protein, putative, Ty3-gypsy subclass, expressed
GSMUA_Achr3T08470_001	2.17666	S-adenosylmethionine synthase
GSMUA_AchrUn_randomT13710_001	9.0607	Sesquiterpene synthase 5
GSMUA_Achr11T04470_001	1.98002	S-norcoclaurine synthase 1
GSMUA_Achr11T04500_001	2.0629	S-norcoclaurine synthase 1
GSMUA_Achr11T04480_001	2.67892	S-norcoclaurine synthase 1
GSMUA_Achr6T11270_001	2.51783	STE_MEK_ste7_MAP2K.6 - STE kinases include homologs to sterile 7, sterile 11 and sterile 20 from yeast, expressed
GSMUA_Achr1T17220_001	3.85424	Stigma/stylar cysteine-rich adhesin
GSMUA_Achr10T28690_001	2.59608	stress-induced protein, putative, expressed
GSMUA_Achr7T08070_001	2.74882	stress-induced protein, putative, expressed
GSMUA_Achr9T09530_001	1.69361	Subtilisin-like protease
GSMUA_Achr10T18660_001	1.49824	Sucrose synthase 2
GSMUA_Achr6T24440_001	2.32452	Sulfate transporter 3.1
GSMUA_AchrUn_randomT18080_001	2.17471	tetraspanin family protein, putative, expressed
GSMUA_Achr5T18880_001	2.00234	Thiosulfate sulfurtransferase, chloroplastic
GSMUA_Achr3T13070_001	1.97422	Transcription factor MYB44
GSMUA_Achr4T20150_001	2.58225	Transcription factor MYB44
GSMUA_Achr3T19660_001	1.90912	U-box domain-containing protein
GSMUA_Achr9T15600_001	3.71818	U-box domain-containing protein 10
GSMUA_Achr8T30420_001	2.53113	U-box domain-containing protein 29
GSMUA_Achr10T18280_001	1.39424	UDP-glucose 6-dehydrogenase
GSMUA_Achr3T30310_001	1.81826	UDP-glucose 6-dehydrogenase
GSMUA_Achr7T26580_001	1.87819	UDP-glucose 6-dehydrogenase
GSMUA_Achr7T11700_001	4.07237	uncharacterized glycosyl hydrolase Rv2006/MT2062, putative, expressed
GSMUA_Achr9T19860_001	1.56135	Zinc finger A20 and AN1 domain-containing stress-associated protein 1
GSMUA_Achr3T11070_001	1.59304	Zinc finger A20 and AN1 domain-containing stress-associated protein 1
GSMUA_Achr3T22730_001	1.72366	Zinc finger A20 and AN1 domain-containing stress-associated protein 4
GSMUA_Achr11T24730_001	1.97879	Zinc finger CCCH domain-containing protein 33
GSMUA_Achr2T19470_001	1.34665	Zinc transporter 4, chloroplastic

## Sheet: Metabolic pathways
Gene ID	Log2Ratio(Melatonin/control)	Description
GSMUA_AchrUn_randomT13710_001	9.0607	Sesquiterpene synthase 5
GSMUA_Achr6T04860_001	4.21221	Hypothetical protein
GSMUA_Achr9T07610_001	4.08064	Putative Uncharacterized WD repeat-containing protein alr2800
GSMUA_Achr10T15730_001	4.05146	cell wall invertase [Musa acuminata]
GSMUA_AchrUn_randomT29140_001	4.03968	Peroxidase 70
GSMUA_Achr6T10910_001	4.03934	Chalcone synthase 4
GSMUA_Achr6T14580_001	3.8849	Hypothetical protein
GSMUA_Achr5T12160_001	3.63665	Probable galacturonosyltransferase-like 4
GSMUA_Achr7T03220_001	3.40613	Putative E3 ubiquitin-protein ligase PUB23
GSMUA_Achr1T08716_001	3.21871	NBS-LRR class resistance protein (Fragment)
GSMUA_Achr10T12200_001	3.11738	Chalcone synthase
GSMUA_Achr8T11210_001	3.06325	Putative Xyloglucan galactosyltransferase KATAMARI1 homolog
GSMUA_Achr5T04080_001	2.92794	Leucoanthocyanidin dioxygenase
GSMUA_Achr2T01110_001	2.91167	Putative uncharacterized protein
GSMUA_Achr10T14220_001	2.89707	Peroxidase 4
GSMUA_Achr1T24090_001	2.86147	Putative Probable receptor-like protein kinase At5g24010
GSMUA_Achr1T08470_001	2.85667	pherophorin-dz1 protein [Volvox carteri f. nagariensis]
GSMUA_Achr7T08070_001	2.74882	stress-induced protein, putative, expressed
GSMUA_Achr5T28270_001	2.69402	Phosphoinositide phospholipase C 4
GSMUA_Achr11T04480_001	2.67892	S-norcoclaurine synthase 1
GSMUA_Achr1T00190_001	2.62252	Probable galacturonosyltransferase-like 4
GSMUA_Achr9T16910_001	2.60133	Endoglucanase 9
GSMUA_Achr9T10200_001	2.59668	Reticulon-like protein B8
GSMUA_Achr10T28690_001	2.59608	stress-induced protein, putative, expressed
GSMUA_Achr10T00680_001	2.58195	hs1, putative, expressed
GSMUA_Achr2T07240_001	2.53391	Putative PB1 domain containing protein, expressed
GSMUA_Achr8T30420_001	2.53113	U-box domain-containing protein 29
GSMUA_AchrUn_randomT24330_001	2.51322	Putative uncharacterized protein
GSMUA_Achr1T18560_001	2.49148	armadillo/beta-catenin repeat family protein, putative, expressed
GSMUA_Achr11T04520_001	2.44965	Putative S-norcoclaurine synthase 1
GSMUA_Achr4T06520_001	2.34084	Probable ribose-5-phosphate isomerase
GSMUA_AchrUn_randomT26440_001	2.34025	Putative Protein SRG1
GSMUA_Achr10T16790_001	2.29613	glycosyl transferase family 17 protein, putative, expressed
GSMUA_Achr3T30130_001	2.27805	LOB domain-containing protein 39
GSMUA_Achr2T02770_001	2.25439	Naringenin,2-oxoglutarate 3-dioxygenase (Fragment)
GSMUA_Achr5T07480_001	2.23948	Expansin-A2
GSMUA_Achr8T26850_001	2.21844	Auxin-induced protein PCNT115
GSMUA_Achr3T08470_001	2.17666	S-adenosylmethionine synthase
GSMUA_Achr11T04490_001	2.14431	Putative S-norcoclaurine synthase 1
GSMUA_Achr6T21530_001	2.14058	Peroxidase 52
GSMUA_Achr8T12460_001	2.12167	Putative 21 kDa protein
GSMUA_Achr9T12620_001	2.09508	EF hand family protein, putative, expressed
GSMUA_Achr11T04500_001	2.0629	S-norcoclaurine synthase 1
GSMUA_Achr9T20550_001	2.01607	Putative peroxisomal-coenzyme A synthetase
GSMUA_Achr3T29120_001	1.99631	Putative Predicted protein
GSMUA_Achr11T04470_001	1.98002	S-norcoclaurine synthase 1
GSMUA_Achr11T24730_001	1.97879	Zinc finger CCCH domain-containing protein 33
GSMUA_Achr4T28860_001	1.95704	Putative Dihydroflavonol-4-reductase
GSMUA_Achr10T07480_001	1.95007	Arginine decarboxylase
GSMUA_Achr11T09090_001	1.92318	Putative harpin-induced protein 1 domain containing protein, expressed
GSMUA_Achr6T35880_001	1.90553	Putative 2-aminoethanethiol dioxygenase
GSMUA_Achr5T07390_001	1.90285	Pyruvate decarboxylase isozyme 2
GSMUA_Achr7T26570_001	1.89394	Hypothetical protein
GSMUA_Achr7T26580_001	1.87819	UDP-glucose 6-dehydrogenase
GSMUA_Achr5T22180_001	1.85701	Hypothetical protein
GSMUA_Achr6T14620_001	1.85282	Putative Peroxidase 52
GSMUA_Achr3T30310_001	1.81826	UDP-glucose 6-dehydrogenase
GSMUA_AchrUn_randomT20360_001	1.79847	Hypothetical protein
GSMUA_Achr6T00850_001	1.79835	Hypothetical protein
GSMUA_Achr7T22130_001	1.78738	Putative U-box domain-containing protein 16
GSMUA_Achr11T04550_001	1.76822	Putative S-norcoclaurine synthase 1
GSMUA_Achr1T23960_001	1.75847	Cellulose synthase-like protein D2
GSMUA_Achr9T07530_001	1.75704	glycosyl transferase family 17 protein, putative, expressed
GSMUA_Achr5T21900_001	1.75551	EDR2, putative, expressed
GSMUA_Achr2T13770_001	1.74565	Putative Remorin
GSMUA_Achr9T01630_001	1.73844	Adenosylhomocysteinase
GSMUA_Achr8T14210_001	1.72015	4-coumarate--CoA ligase-like 1
GSMUA_Achr8T25140_001	1.70251	Putative U-box domain-containing protein 16
GSMUA_Achr9T09530_001	1.69361	Subtilisin-like protease
GSMUA_Achr3T20420_001	1.69254	Putative phosphate-induced protein 1 conserved region domain containing protein, expressed
GSMUA_Achr10T15740_001	1.68857	cell wall invertase [Musa acuminata]
GSMUA_AchrUn_randomT22570_001	1.6703	Hypothetical protein
GSMUA_Achr1T03980_001	1.6616	EF hand family protein, putative, expressed
GSMUA_Achr4T15090_001	1.64784	expressed protein
GSMUA_Achr7T12260_001	1.64748	Putative expressed protein
GSMUA_Achr6T32910_001	1.62475	Putative Zinc finger CCCH domain-containing protein 66
GSMUA_Achr1T17560_001	1.60948	Hypothetical protein
GSMUA_Achr6T13160_001	1.59567	cell wall invertase [Musa acuminata]
GSMUA_Achr7T26260_001	1.58678	Putative LOB domain-containing protein 37
GSMUA_Achr5T04350_001	1.56051	L-ascorbate oxidase
GSMUA_Achr7T18420_001	1.51367	1-aminocyclopropane-1-carboxylate oxidase
GSMUA_Achr10T18660_001	1.49824	Sucrose synthase 2
GSMUA_Achr5T09690_001	1.47641	Putative 1-aminocyclopropane-1-carboxylate oxidase
GSMUA_Achr5T28920_001	1.47217	hs1, putative, expressed
GSMUA_Achr1T17550_001	1.464	Catalase isozyme 2
GSMUA_Achr10T13760_001	1.46334	Putative Non-specific lipid-transfer protein-like protein At2g13820
GSMUA_AchrUn_randomT04690_001	1.45144	Putative RING-H2 zinc finger protein RHA1a
GSMUA_Achr10T12080_001	1.44603	Obtusifoliol 14-alpha demethylase
GSMUA_Achr2T13410_001	1.44208	Putative Zinc finger protein 1
GSMUA_Achr10T18280_001	1.39424	UDP-glucose 6-dehydrogenase
GSMUA_AchrUn_randomT05270_001	1.38332	expressed protein
GSMUA_Achr6T15760_001	1.29312	Putative Wound-induced protein 1
GSMUA_Achr8T11740_001	1.23788	Aldehyde dehydrogenase family 3 member F1
GSMUA_Achr7T27090_001	1.21893	Cycloartenol-C-24-methyltransferase 1
GSMUA_Achr11T11040_001	1.19874	Glyceraldehyde-3-phosphate dehydrogenase, cytosolic 3
GSMUA_Achr11T15350_001	-1.18711	Ribulose-phosphate 3-epimerase, cytoplasmic isoform
GSMUA_AchrUn_randomT03740_001	-1.33515	Putative Probable phosphatase phospho1
GSMUA_Achr2T15360_001	-1.37426	membrane protein, putative, expressed
GSMUA_Achr7T19810_001	-1.38489	Sucrose synthase 1
GSMUA_Achr5T06740_001	-1.42478	VMP3 protein [Volvox carteri f. nagariensis]
GSMUA_Achr10T10830_001	-1.47182	Putative UPF0580 protein C15orf58 homolog
GSMUA_Achr7T06660_001	-1.48586	L-lactate dehydrogenase A
GSMUA_Achr3T07670_001	-1.52595	Probable NAD(P)H-dependent oxidoreductase 1
GSMUA_Achr11T03550_001	-1.52687	Hypothetical protein
GSMUA_Achr11T01280_001	-1.53842	SK3-type dehydrin [Musa ABB Group]
GSMUA_Achr9T25760_001	-1.5868	Cysteine synthase
GSMUA_Achr10T29560_001	-1.63217	plant viral response family protein, putative, expressed
GSMUA_Achr5T27130_001	-1.63438	Ocs element-binding factor 1
GSMUA_Achr1T16770_001	-1.66803	Hypothetical protein
GSMUA_Achr4T18220_001	-1.67061	Putative Extended synaptotagmin-2
GSMUA_Achr9T14110_001	-1.69795	Trans-cinnamate 4-monooxygenase
GSMUA_AchrUn_randomT16180_001	-1.70496	Momilactone A synthase
GSMUA_Achr3T07660_001	-1.72517	Probable NAD(P)H-dependent oxidoreductase 1
GSMUA_Achr7T03510_001	-1.77333	Hypothetical protein
GSMUA_Achr2T11090_001	-1.78075	Putative GDSL esterase/lipase At1g71250
GSMUA_Achr1T14080_001	-1.79956	Bifunctional 3'-phosphoadenosine 5'-phosphosulfate synthase 2
GSMUA_AchrUn_randomT16850_001	-1.82133	Putative 6-hydroxynicotinate 3-monooxygenase
GSMUA_Achr9T29630_001	-1.82559	Putative E3 ubiquitin-protein ligase PUB23
GSMUA_Achr6T00870_001	-1.83571	1-aminocyclopropane-1-carboxylate oxidase
GSMUA_Achr7T08230_001	-1.86866	gibberellin 20 oxidase 2, putative, expressed
GSMUA_Achr11T24060_001	-1.87604	Tropinone reductase homolog At1g07440
GSMUA_Achr9T05900_001	-1.90505	Putative Phosphoethanolamine/phosphocholine phosphatase
GSMUA_Achr1T09070_001	-1.9431	Phenylalanine ammonia-lyase
GSMUA_Achr8T20430_001	-1.94377	Short-chain type dehydrogenase/reductase
GSMUA_Achr5T04560_001	-1.97118	Tropinone reductase homolog At1g07440
GSMUA_Achr3T02810_001	-1.97229	12-oxophytodienoate reductase 2
GSMUA_Achr7T06590_001	-1.99222	Putative Cytochrome P450 89A2
GSMUA_Achr10T10390_001	-2.05412	Momilactone A synthase
GSMUA_Achr3T01140_001	-2.10643	Chalcone synthase 2
GSMUA_Achr6T30710_001	-2.11653	Putative Cytochrome P450 71D10
GSMUA_Achr6T33870_001	-2.13756	Laccase-25
GSMUA_Achr7T11550_001	-2.16209	6-phosphofructokinase 5, chloroplastic
GSMUA_Achr1T00620_001	-2.17819	Putative Phosphorylated carbohydrates phosphatase TM_1254
GSMUA_Achr7T18020_001	-2.24708	Putative Uncharacterized hydroxylase C887.15c
GSMUA_Achr6T30740_001	-2.28214	Putative Cytochrome P450 71D10
GSMUA_Achr10T20590_001	-2.30639	Chalcone synthase J
GSMUA_Achr3T13570_001	-2.45455	Bifunctional 3'-phosphoadenosine 5'-phosphosulfate synthase 2
GSMUA_Achr3T24070_001	-2.53477	Glyoxysomal fatty acid beta-oxidation multifunctional protein MFP-a
GSMUA_Achr7T18580_001	-2.54609	plant viral response family protein, putative, expressed
GSMUA_Achr9T03430_001	-2.6495	Tropinone reductase homolog
GSMUA_Achr9T30630_001	-2.67858	Putative Cytochrome P450 71D8
GSMUA_Achr8T26890_001	-2.73836	Bifunctional 3'-phosphoadenosine 5'-phosphosulfate synthase
GSMUA_Achr9T30610_001	-2.74061	Putative Cytochrome P450 71D8
GSMUA_Achr7T03450_001	-2.77737	Polyphenol oxidase, chloroplastic
GSMUA_AchrUn_randomT27040_001	-2.79869	Trans-cinnamate 4-monooxygenase
GSMUA_Achr7T19900_001	-2.81914	Metalloendoproteinase 1
GSMUA_Achr8T04550_001	-2.9892	Homocysteine S-methyltransferase 2
GSMUA_Achr9T17320_001	-3.34989	Putative Alpha-glucosidase yihQ
GSMUA_Achr8T32610_001	-3.45419	Putative Cytochrome P450 71A2
GSMUA_Achr5T29740_001	-4.37856	Chalcone synthase 2
GSMUA_Achr2T04820_001	-4.59538	Caffeic acid 3-O-methyltransferase
GSMUA_AchrUn_randomT28090_001	-5.10406	Putative Germin-like protein 3-7
GSMUA_Achr6T21070_001	-5.34865	Putative plant-specific domain TIGR01615 family protein, expressed
GSMUA_Achr2T04380_001	-6.05278	Caffeic acid O-methyltransferase [Iris x hollandica]
GSMUA_Achr4T28840_001	-8.48113	Beta-glucosidase 18

## Sheet: Signalling 
Gene ID	Log2Ratio(Melatonin/control)	Description
GSMUA_Achr7T27070_001	-3.55114	Sugar transport protein 13
GSMUA_Achr9T21210_001	-2.9959	Putative Uncharacterized transporter YBR287W
GSMUA_Achr2T01540_001	-2.87843	Putative syntaxin-131
GSMUA_AchrUn_randomT17040_001	-2.81395	expressed protein
GSMUA_Achr10T12150_001	-2.287	AP2 domain transcription factor RAP2.3, putative
GSMUA_Achr1T03910_001	-2.25794	HSP transcription factor
GSMUA_Achr5T15900_001	-2.03596	Putative Heat stress transcription factor A-3
GSMUA_Achr10T18670_001	-1.87662	Putative AP2 domain class transcription factor
GSMUA_Achr9T29630_001	-1.82559	Putative E3 ubiquitin-protein ligase PUB23
GSMUA_Achr9T29350_001	-1.81382	Hypothetical protein
GSMUA_Achr7T03510_001	-1.77333	Hypothetical protein
GSMUA_AchrUn_randomT21350_001	-1.59975	Hypothetical protein
GSMUA_Achr5T09010_001	-1.58833	Calmodulin
GSMUA_Achr4T06820_001	-1.53344	LOB domain-containing protein 41
GSMUA_Achr10T10830_001	-1.47182	Putative UPF0580 protein C15orf58 homolog
GSMUA_Achr8T14210_001	1.72015	4-coumarate--CoA ligase-like 1
GSMUA_Achr7T07200_001	1.60467	Abscisic acid 8'-hydroxylase 1
GSMUA_Achr11T00590_001	1.74069	Aquaporin PIP2-3
GSMUA_Achr10T07480_001	1.95007	Arginine decarboxylase
GSMUA_Achr6T10910_001	4.03934	Chalcone synthase 4
GSMUA_Achr9T12070_001	1.63189	Chitin-inducible gibberellin-responsive protein 1
GSMUA_Achr4T19660_001	3.70749	Dehydration-responsive element-binding protein 1D
GSMUA_Achr8T11980_001	9.42836	Dehydration-responsive element-binding protein 1E
GSMUA_Achr9T16910_001	2.60133	Endoglucanase 9
GSMUA_Achr3T16850_001	2.55728	ethylene-responsive protein related, putative, expressed
GSMUA_Achr7T12790_001	1.97813	helix-loop-helix DNA-binding protein, putative, expressed
GSMUA_Achr11T17370_001	2.13443	Hypothetical protein
GSMUA_Achr7T06910_001	2.14611	Hypothetical protein
GSMUA_Achr4T02560_001	2.40622	Hypothetical protein
GSMUA_Achr4T01510_001	2.55531	Hypothetical protein
GSMUA_Achr5T04080_001	2.92794	Leucoanthocyanidin dioxygenase
GSMUA_Achr6T36750_001	1.48869	Nitrate transporter 1.1	chlorate transporter, putative, expressed [Oryza sativa Japonica Group]
GSMUA_Achr10T24630_001	3.41137	phosphate-induced protein 1 conserved region domain containing protein, expressed
GSMUA_Achr10T24650_001	3.82448	phosphate-induced protein 1 conserved region domain containing protein, expressed
GSMUA_Achr5T28270_001	2.69402	Phosphoinositide phospholipase C 4
GSMUA_Achr5T11480_001	2.32661	Probable aquaporin PIP2-6
GSMUA_Achr9T29700_001	2.02194	Probable CCR4-associated factor 1 homolog 11
GSMUA_Achr6T19450_001	2.1932	Probable CCR4-associated factor 1 homolog 11
GSMUA_Achr7T00150_001	1.42085	Probable indole-3-acetic acid-amido synthetase GH3.1
GSMUA_Achr7T26370_001	2.01099	Probable indole-3-acetic acid-amido synthetase GH3.8
GSMUA_Achr8T10420_001	2.07677	Probable protein phosphatase 2C 33
GSMUA_Achr6T11170_001	1.41399	Probable protein phosphatase 2C 78
GSMUA_Achr4T02550_001	2.52047	Probable rhamnose biosynthetic enzyme 1
GSMUA_Achr5T21880_001	3.10711	Probable xyloglucan endotransglucosylase/hydrolase protein 23
GSMUA_Achr3T05200_001	3.43276	Probable xyloglucan endotransglucosylase/hydrolase protein 23
GSMUA_Achr7T16430_001	3.55181	Probable xyloglucan endotransglucosylase/hydrolase protein 23
GSMUA_Achr10T23480_001	3.64949	Probable xyloglucan endotransglucosylase/hydrolase protein 23
GSMUA_Achr9T13820_001	4.05209	Probable xyloglucan endotransglucosylase/hydrolase protein 23
GSMUA_Achr9T05820_001	1.40335	protein kinase domain containing protein, expressed
GSMUA_Achr6T35880_001	1.90553	Putative 2-aminoethanethiol dioxygenase
GSMUA_Achr9T29480_001	3.77782	Putative Auxin response factor 17
GSMUA_Achr3T23000_001	1.75083	Putative Caltractin (Fragment)
GSMUA_Achr6T22020_001	2.60499	Putative Cysteine-rich receptor-like protein kinase 25
GSMUA_Achr7T05900_001	2.64333	Putative Dehydration-responsive element-binding protein 1D
GSMUA_Achr7T03220_001	3.40613	Putative E3 ubiquitin-protein ligase PUB23
GSMUA_Achr1T00480_001	1.73029	Putative Ethylene-responsive transcription factor ERF105
GSMUA_Achr6T00170_001	1.36181	Putative G-box-binding factor 1
GSMUA_Achr2T06010_001	1.34434	Putative Leucine-rich repeat receptor protein kinase EXS
GSMUA_Achr1T23990_001	2.7247	putative MYB DNA-binding domain superfamily protein [Zea mays]
GSMUA_Achr6T05710_001	3.61884	Putative OsWRKY69 - Superfamily of TFs having WRKY and zinc finger domains, expressed
GSMUA_Achr1T10080_001	2.67844	Putative Probable WRKY transcription factor 40
GSMUA_Achr11T09290_001	2.80339	Putative Protein TIFY 10B
GSMUA_Achr3T21970_001	2.58699	Putative Receptor-like protein kinase HAIKU2
GSMUA_Achr4T07190_001	1.29494	Putative Scarecrow-like protein 15
GSMUA_Achr8T26280_001	1.80841	Putative Transcription factor bHLH3
GSMUA_Achr7T03640_001	1.69154	Putative uncharacterized protein
GSMUA_Achr9T07610_001	4.08064	Putative Uncharacterized WD repeat-containing protein alr2800
GSMUA_AchrUn_randomT09900_001	1.70129	Putative Whole genome shotgun sequence of line PN40024, scaffold_0.assembly12x (Fragment)
GSMUA_Achr6T32910_001	1.62475	Putative Zinc finger CCCH domain-containing protein 66
GSMUA_Achr5T28260_001	1.85982	Putative Zinc finger CCCH domain-containing protein 66
GSMUA_Achr2T06080_001	1.55446	Ras-related protein ARA-4
GSMUA_Achr3T21290_001	2.2666	Ras-related protein Rab11D
GSMUA_Achr5T18880_001	2.00234	Thiosulfate sulfurtransferase, chloroplastic
GSMUA_Achr4T20150_001	2.58225	Transcription factor MYB44

## Sheet: Receptor kinase
Gene ID	Log2Ratio(Melatonin/control)	Description
GSMUA_Achr6T22020_001	2.60499	Putative Cysteine-rich receptor-like protein kinase 25
GSMUA_Achr2T06010_001	1.34434	Putative Leucine-rich repeat receptor protein kinase EXS
GSMUA_Achr11T02820_001	2.13055	Putative Probable receptor-like protein kinase At5g24010
GSMUA_Achr1T24090_001	2.86147	Putative Probable receptor-like protein kinase At5g24010
GSMUA_Achr3T21970_001	2.58699	Putative Receptor-like protein kinase HAIKU2
GSMUA_Achr11T06320_001	2.41887	Putative Wall-associated receptor kinase 5
GSMUA_Achr2T08740_001	1.70969	Putative Wall-associated receptor kinase-like 14
GSMUA_Achr9T04860_001	1.43434	Receptor-like protein kinase FERONIA

## Sheet: Ethylene
Gene ID	Log2Ratio(Melatonin/control)	Description
GSMUA_Achr6T00870_001	-1.83571	1-aminocyclopropane-1-carboxylate oxidase
GSMUA_Achr7T18420_001	1.51367	1-aminocyclopropane-1-carboxylate oxidase
GSMUA_Achr3T16850_001	2.55728	ethylene-responsive protein related, putative, expressed
GSMUA_Achr11T15810_001	3.92457	Ethylene-responsive transcription factor ERF071
GSMUA_Achr5T09690_001	1.47641	Putative 1-aminocyclopropane-1-carboxylate oxidase
GSMUA_Achr11T03210_001	4.11607	Putative Ethylene-responsive transcription factor ERF024
GSMUA_Achr1T00480_001	1.73029	Putative Ethylene-responsive transcription factor ERF105
GSMUA_Achr1T23990_001	2.7247	putative MYB DNA-binding domain superfamily protein [Zea mays]
GSMUA_Achr6T05710_001	3.61884	Putative OsWRKY69 - Superfamily of TFs having WRKY and zinc finger domains, expressed

## Sheet: Auxin
Gene ID	Log2Ratio(Melatonin/control)	Description
GSMUA_Achr4T16560_001	-2.28177	Putative Auxin-induced in root cultures protein 12
GSMUA_Achr8T26850_001	2.21844	Auxin-induced protein PCNT115
GSMUA_Achr7T00150_001	1.42085	Probable indole-3-acetic acid-amido synthetase GH3.1
GSMUA_Achr7T26370_001	2.01099	Probable indole-3-acetic acid-amido synthetase GH3.8
GSMUA_Achr9T29480_001	3.77782	Putative Auxin response factor 17

## Sheet: MAPK
Gene ID	Log2Ratio(Melatonin/control)	Description
GSMUA_Achr6T33100_001	1.55877	Mitogen-activated protein kinase 5
GSMUA_Achr9T05820_001	1.40335	protein kinase domain containing protein, expressed
GSMUA_Achr9T29700_001	2.02194	Probable CCR4-associated factor 1 homolog 11
GSMUA_Achr6T19450_001	2.1932	Probable CCR4-associated factor 1 homolog 11

## Sheet: ROS
Gene ID	Log2Ratio(Melatonin/control)	Description
GSMUA_Achr7T02760_001	-2.65107	Putative selenium-binding protein
GSMUA_Achr5T07360_001	-1.65015	heat shock protein DnaJ, putative, expressed
GSMUA_Achr10T10830_001	-1.47182	Putative UPF0580 protein C15orf58 homolog
GSMUA_Achr11T11040_001	1.19874	Glyceraldehyde-3-phosphate dehydrogenase, cytosolic 3
GSMUA_Achr6T21640_001	1.42824	calcium-binding EF hand family protein, putative, expressed
GSMUA_Achr9T04860_001	1.43434	Receptor-like protein kinase FERONIA
GSMUA_Achr1T17550_001	1.464	Catalase isozyme 2
GSMUA_Achr5T09690_001	1.47641	Putative 1-aminocyclopropane-1-carboxylate oxidase
GSMUA_Achr1T17560_001	1.60948	Hypothetical protein
GSMUA_Achr1T03980_001	1.6616	EF hand family protein, putative, expressed
GSMUA_Achr6T35880_001	1.90553	Putative 2-aminoethanethiol dioxygenase
GSMUA_Achr5T18880_001	2.00234	Thiosulfate sulfurtransferase, chloroplastic
GSMUA_Achr9T11620_001	2.33719	15.4 kDa class V heat shock protein

## Sheet: Cell wall
Gene ID	Log2Ratio(Melatonin/control)	Description
GSMUA_Achr5T18880_001	2.00234	Thiosulfate sulfurtransferase, chloroplastic
GSMUA_Achr9T04860_001	1.43434	Receptor-like protein kinase FERONIA
GSMUA_Achr8T11210_001	3.06325	Putative Xyloglucan galactosyltransferase KATAMARI1 homolog
GSMUA_Achr6T35880_001	1.90553	Putative 2-aminoethanethiol dioxygenase
GSMUA_Achr5T09690_001	1.47641	Putative 1-aminocyclopropane-1-carboxylate oxidase
GSMUA_Achr10T08330_001	2.56255	Probable xyloglucan glycosyltransferase 12
GSMUA_Achr6T30200_001	2.26081	Probable xyloglucan glycosyltransferase 12
GSMUA_Achr11T17890_001	2.13399	Probable xyloglucan endotransglucosylase/hydrolase protein 30
GSMUA_Achr8T30840_001	1.76933	Probable xyloglucan endotransglucosylase/hydrolase protein 28
GSMUA_Achr9T13820_001	4.05209	Probable xyloglucan endotransglucosylase/hydrolase protein 23
GSMUA_Achr10T23480_001	3.64949	Probable xyloglucan endotransglucosylase/hydrolase protein 23
GSMUA_Achr7T16430_001	3.55181	Probable xyloglucan endotransglucosylase/hydrolase protein 23
GSMUA_Achr3T05200_001	3.43276	Probable xyloglucan endotransglucosylase/hydrolase protein 23
GSMUA_Achr5T21880_001	3.10711	Probable xyloglucan endotransglucosylase/hydrolase protein 23
GSMUA_Achr5T07370_001	1.72741	Potassium transporter 1
GSMUA_Achr5T07480_001	2.23948	Expansin-A2
GSMUA_Achr9T16910_001	2.60133	Endoglucanase 9
GSMUA_Achr1T23960_001	1.75847	Cellulose synthase-like protein D2
GSMUA_AchrUn_randomT24320_001	-1.20656	Hypothetical protein
GSMUA_Achr5T17150_001	-1.35278	Hypothetical protein
GSMUA_Achr10T10830_001	-1.47182	Putative UPF0580 protein C15orf58 homolog
GSMUA_Achr8T18890_001	-1.99304	Putative Protein disulfide-isomerase
GSMUA_Achr8T27900_001
GSMUA_Achr8T27910_001
GSMUA_Achr6T21330_001

## Sheet: Aroma
Gene ID	Log2Ratio(Melatonin/control)	Description
GSMUA_Achr4T28840_001	-8.48113	Beta-glucosidase 18
GSMUA_Achr2T04380_001	-6.05278	Caffeic acid O-methyltransferase [Iris x hollandica]
GSMUA_Achr2T04820_001	-4.59538	Caffeic acid 3-O-methyltransferase
GSMUA_Achr3T01140_001	-2.10643	Chalcone synthase 2
GSMUA_Achr1T09070_001	-1.9431	Phenylalanine ammonia-lyase
GSMUA_Achr3T26460_001	-1.71667	Aldehyde dehydrogenase family 2 member C4
GSMUA_Achr6T14850_001	-1.47745	oxidoreductase, putative, expressed
GSMUA_Achr1T03800_001	-1.3192	Putative Probable glutathione S-transferase GSTU6
GSMUA_Achr11T15350_001	-1.18711	Ribulose-phosphate 3-epimerase, cytoplasmic isoform
GSMUA_Achr10T12200_001	3.11738	Chalcone synthase
GSMUA_Achr6T10910_001	4.03934	Chalcone synthase 4
GSMUA_Achr6T24430_001	2.52465	Heat stress transcription factor A-2c
GSMUA_Achr4T02560_001	2.40622	Hypothetical protein
GSMUA_Achr5T04350_001	1.56051	L-ascorbate oxidase
GSMUA_Achr5T04080_001	2.92794	Leucoanthocyanidin dioxygenase
GSMUA_Achr6T33100_001	1.55877	Mitogen-activated protein kinase 5
GSMUA_Achr9T29700_001	2.02194	Probable CCR4-associated factor 1 homolog 11
GSMUA_Achr6T19450_001	2.1932	Probable CCR4-associated factor 1 homolog 11
GSMUA_Achr4T02550_001	2.52047	Probable rhamnose biosynthetic enzyme 1
GSMUA_Achr4T06520_001	2.34084	Probable ribose-5-phosphate isomerase
GSMUA_Achr9T29480_001	3.77782	Putative Auxin response factor 17
GSMUA_Achr7T11760_001	1.52678	Putative Homeobox-leucine zipper protein HOX20
GSMUA_Achr7T03640_001	1.69154	Putative uncharacterized protein
GSMUA_Achr8T23240_001	1.59892	Putative uncharacterized protein Sb04g034290
GSMUA_Achr3T08470_001	2.17666	S-adenosylmethionine synthase

[truncated: 11 more sheets: Wax, Lipid, Secondary metabolites , Flavonoid biosynthesis, Response to stress, Response to fungus, Response to chitins, Protein processing, transport, response to chitin, fatty acid]
